# Supplementary material
Source: publisher figshare collection journal article supplement (https://plos.figshare.com/articles/dataset/_/5582980)
Supplement: Supplementary file 1 [file 1 › S1 Appendix.pdf]

### S1 Appendix Details about initial state and construction of unitary matrices used to generate predictions.

The initial state at the beginning of a trial and before a question appears is defined as  $\psi(0) = [\psi_i(0)]$ , with zeros assigned to all states except for  $\frac{1}{\sqrt{11}}$  assigned to the 11 states  $i = 45, \dots, 50, \dots, 55$  in the neighborhood of the neutral state corresponding to the middle rating  $R = 5$ .

The unitary matrices were constructed from a particular type of quantum random walk model called the Feynman crystal model. Unitary matrices can be constructed from a matrix exponential  $U = \exp(-i \cdot H)$ , where  $H$  is a Hamiltonian matrix (a Hermitian matrix). The Hamiltonian matrix we used,  $H = [h_{ij}]$ , is a tri-diagonal matrix. The entries  $h_{i-1,j} = \alpha$  above the diagonal and  $h_{i+1,j} = \alpha$  below the diagonal allow diffusion of amplitudes to adjacent states. The entries on the diagonal  $h_{ii} = \beta \cdot (\frac{i}{N})$  serve as the potential function. The potential on the diagonal corresponds to a linear potential function that produces constant force in the direction determined by  $\beta$ . The off diagonal entries determine the diffusion rate. We used a Hamiltonian matrix  $H_A$  with parameters  $(\alpha_A, \beta_A)$  for the one issue, and we used another Hamiltonian matrix  $H_B$  with parameters  $(\alpha_B, \beta_B)$  for the other issue. In sum, this model entails only two parameters for each of the two different types of questions.

The best fitting parameters from [?] were used to generate the predictions. We set  $\beta = -14.5725$ ,  $\alpha = 4.5975$  for issue A, and we set  $\alpha = 4.5975$  for issue B and varied  $\beta$  from  $-30$  to  $+30$  to sweep out the model predictions shown in Figure 1. The middle of the range for  $\beta$  on issue B corresponds to the value of  $\beta$  used for issue A, and so the questions become compatible at this point.
